# Supplementary figures and images for: In vitro and in vivo toxicology of bare and PEGylated fluorescent carbonaceous nanodots in mice and zebrafish: the potential relationship with autophagy
Source: Royal Society of Chemistry journal article supplement (doi:10.1039/c5ra05201g), 2015-01-01

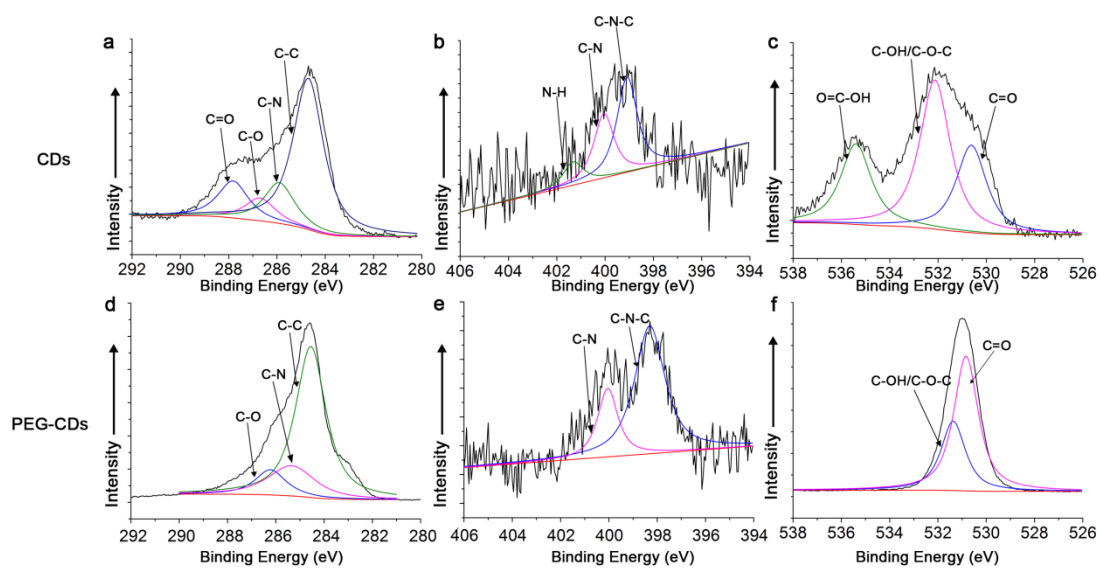

Fig. S1 High resolution XPS spectra for CDs and PEG-CDs:  $C_{1s}$  spectrum (a, d);  $N_{1s}$  spectrum (b, e);  $O_{1s}$  spectrum (c, f).

Supplement: c5ra05201g1.pdf [file c5ra05201g1.pdf]
